# Supplementary material
Source: publisher figshare collection journal article supplement (https://acs.figshare.com/ndownloader/files/21089649)
Supplement: Supplementary file 1 [file 21089649]

# Modifying the Wettability of Sandstones Using Nonfluorinated Silylation: To Minimize the Water Blockage Effect

*Eghan Arjomand,<sup>†,‡</sup> Matthew Myers,<sup>‡</sup> Nasser Mohammed Al Hinai,<sup>†</sup> Colin D. Wood,<sup>\*,†,‡</sup> and Ali Saeedi,<sup>\*,†</sup>*

<sup>†</sup>Curtin University of Technology, Kensington, WA 6152, Australia

<sup>‡</sup>CSIRO Australian Resources Research Centre, Kensington, WA 6152, Australia

KEYWORDS: Supercritical, CO<sub>2</sub>, Wettability, Surface Modification and Multiphase Flow.

Number of pages: 20

Number of figures: 18

Number of tables: 1

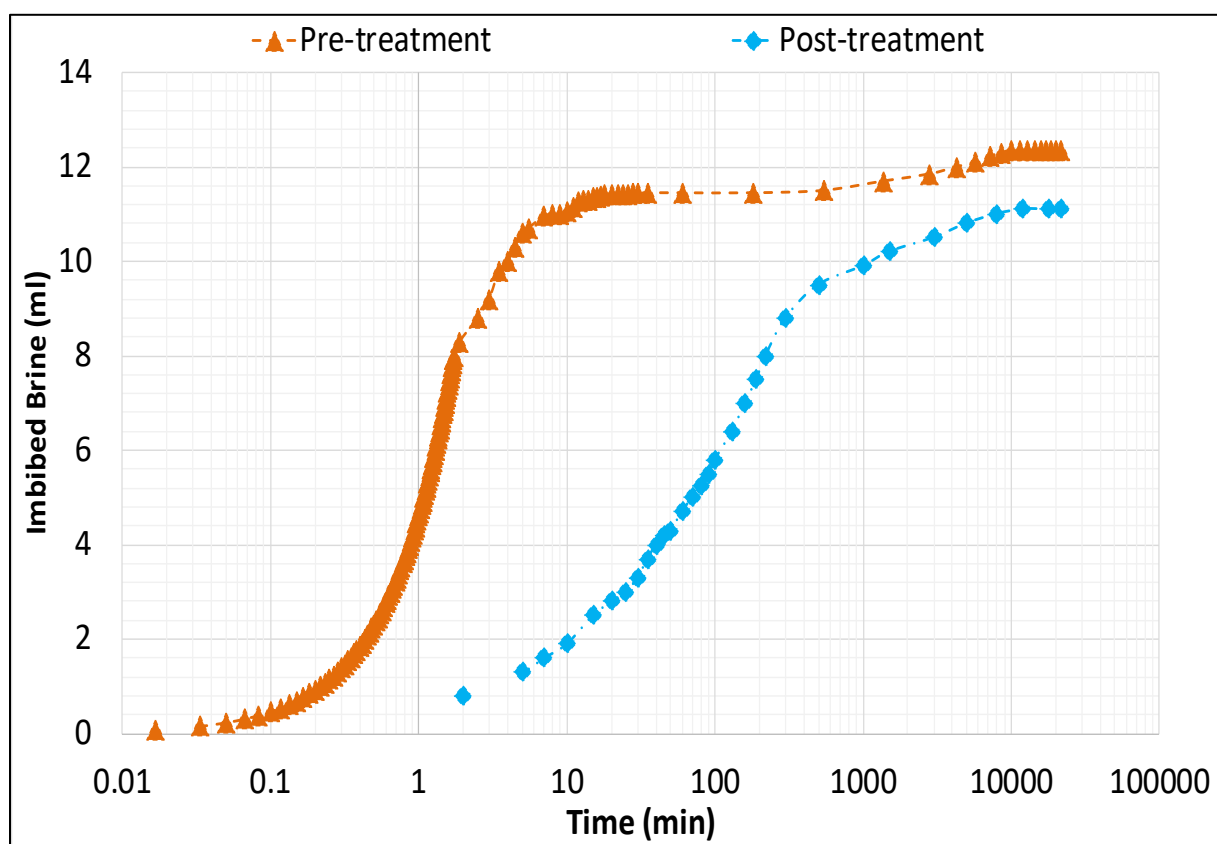

**Figure S1.** Spontaneous brine imbibition vs time in GB.1, pre- and post-treatment.

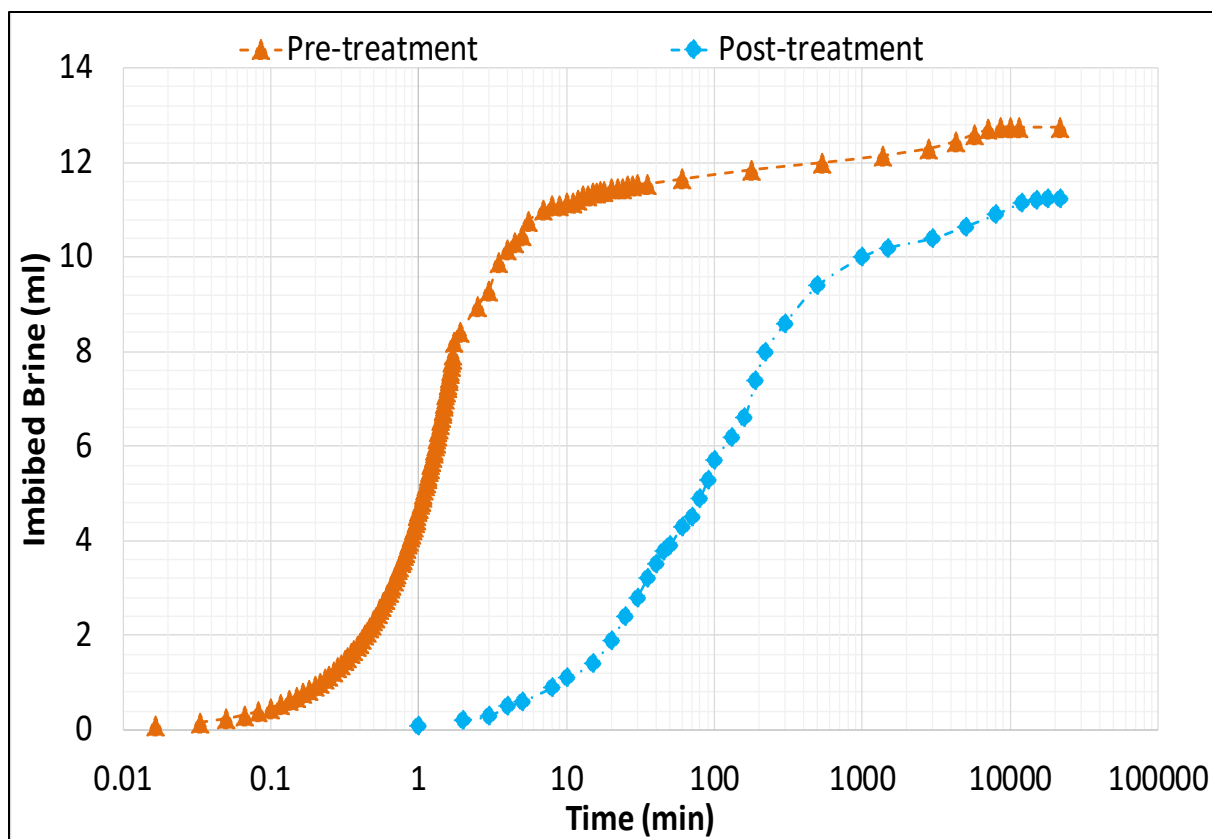

**Figure S2.** Spontaneous brine imbibition vs time in GB.3, pre- and post-treatment.

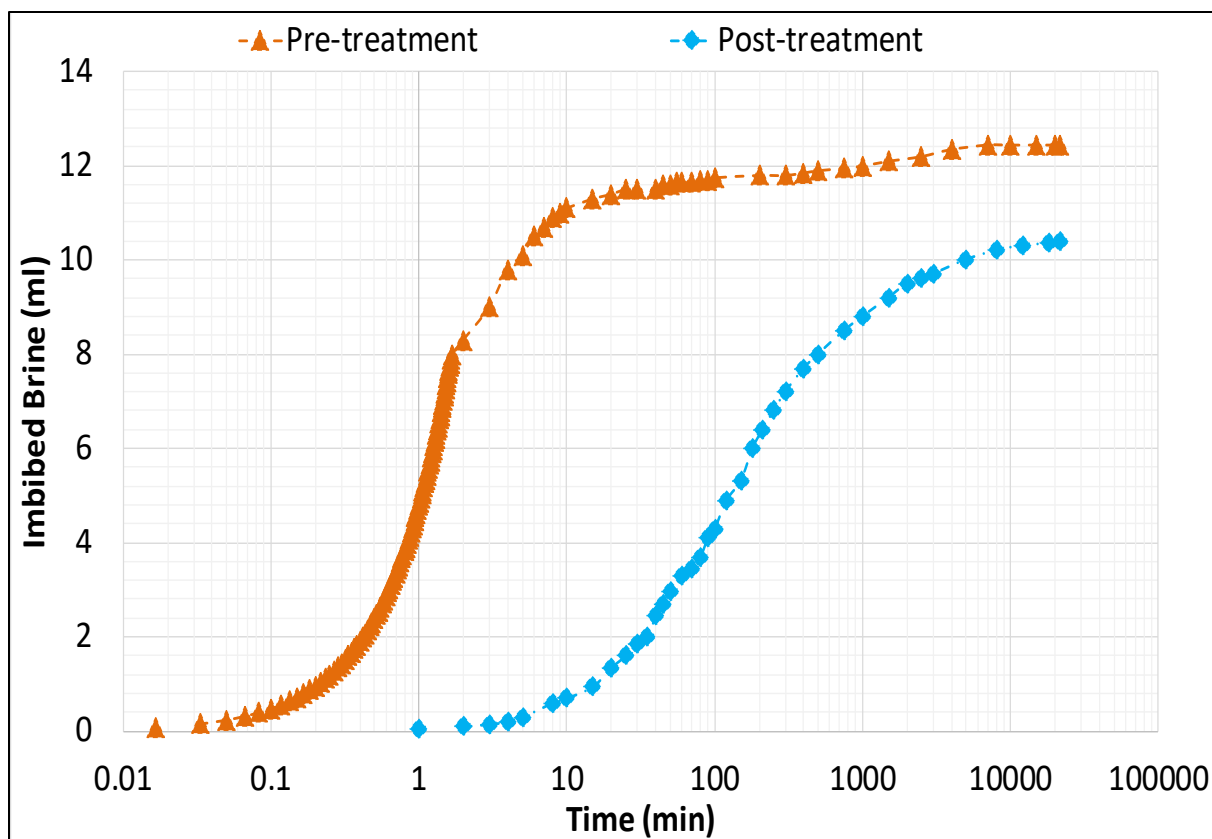

**Figure S3.** Spontaneous brine imbibition vs time in GB.4, pre- and post-treatment.

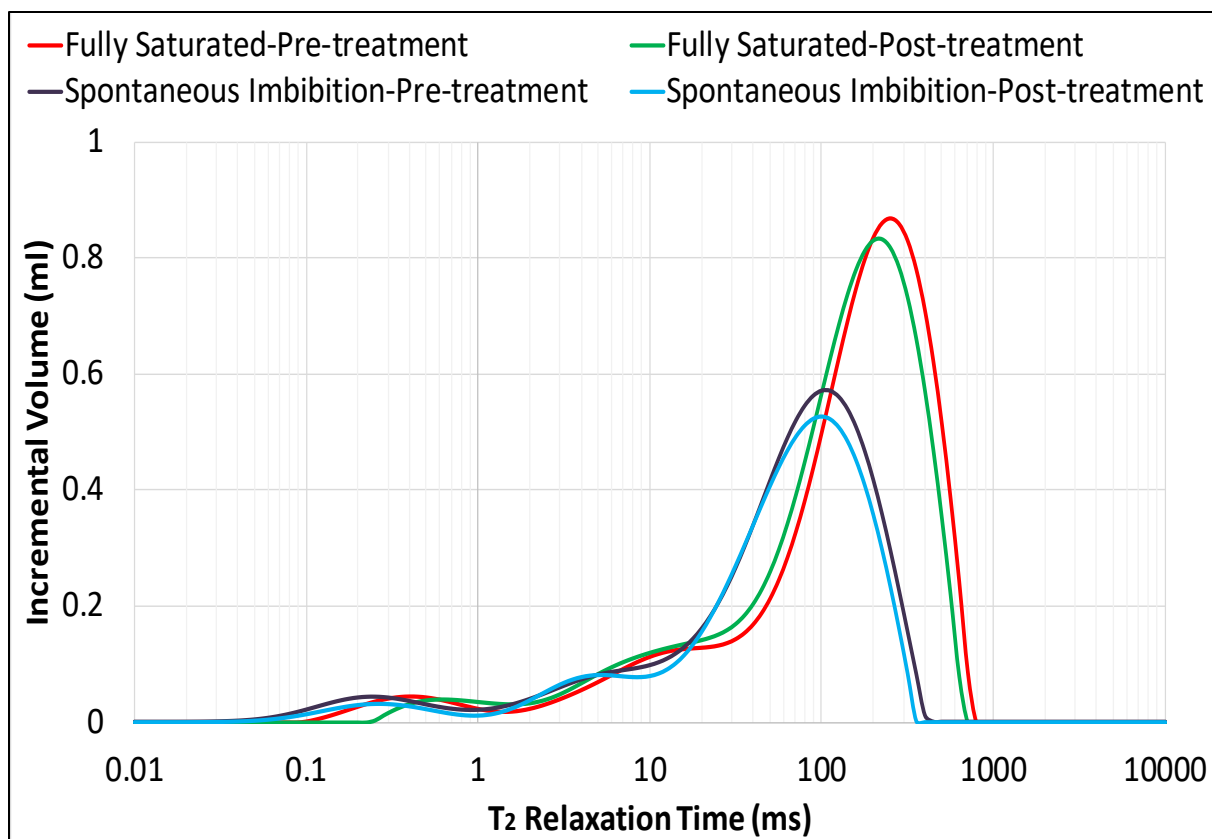

**Figure S4.** Incremental brine volume for pre- and post-treated GB.1.

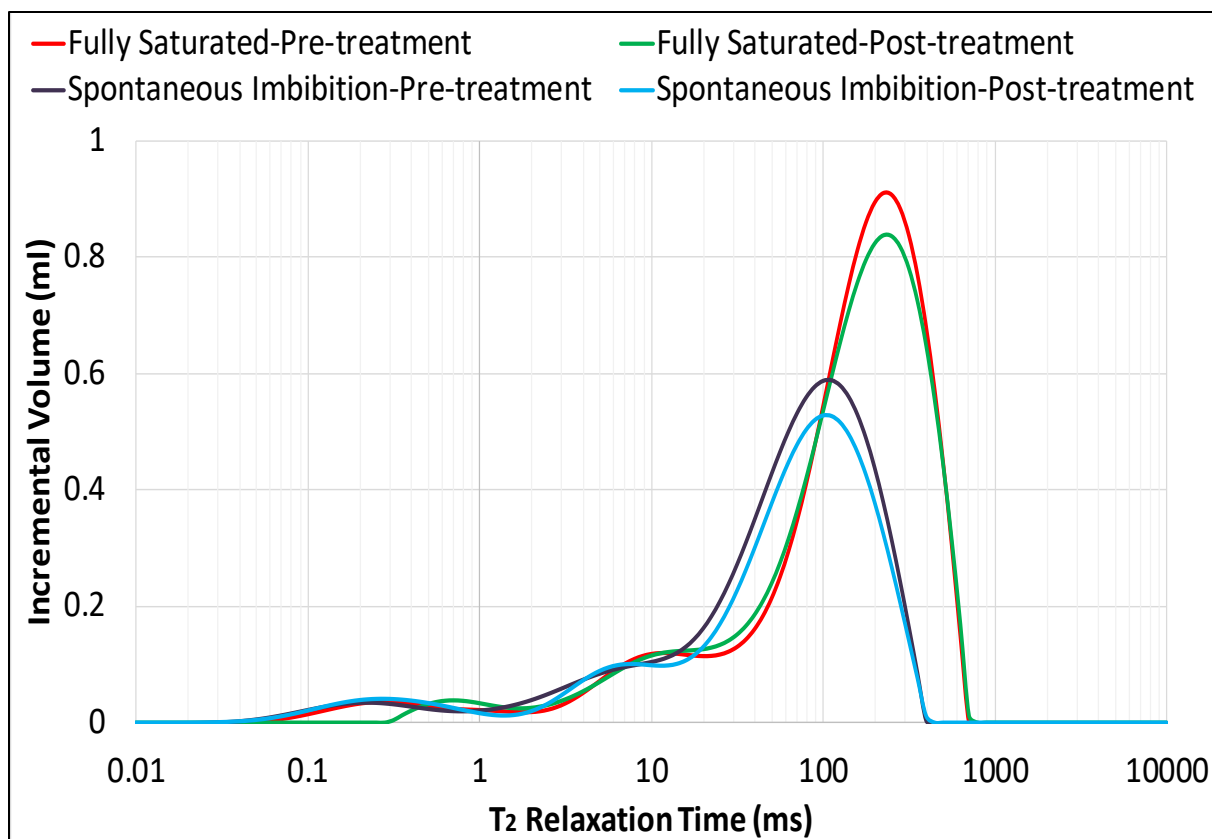

**Figure S5.** Incremental brine volume for pre- and post-treated GB.3.

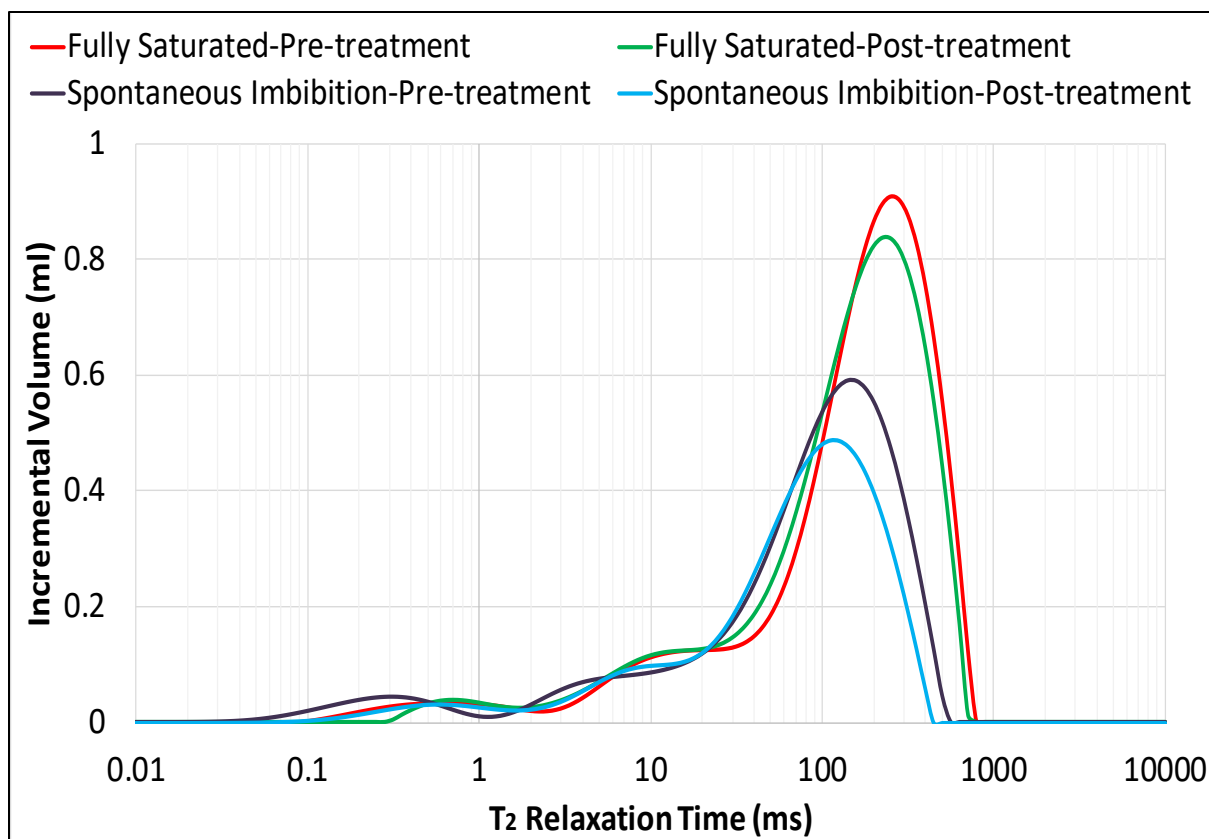

**Figure S6.** Incremental brine volume for pre- and post-treated GB.4.

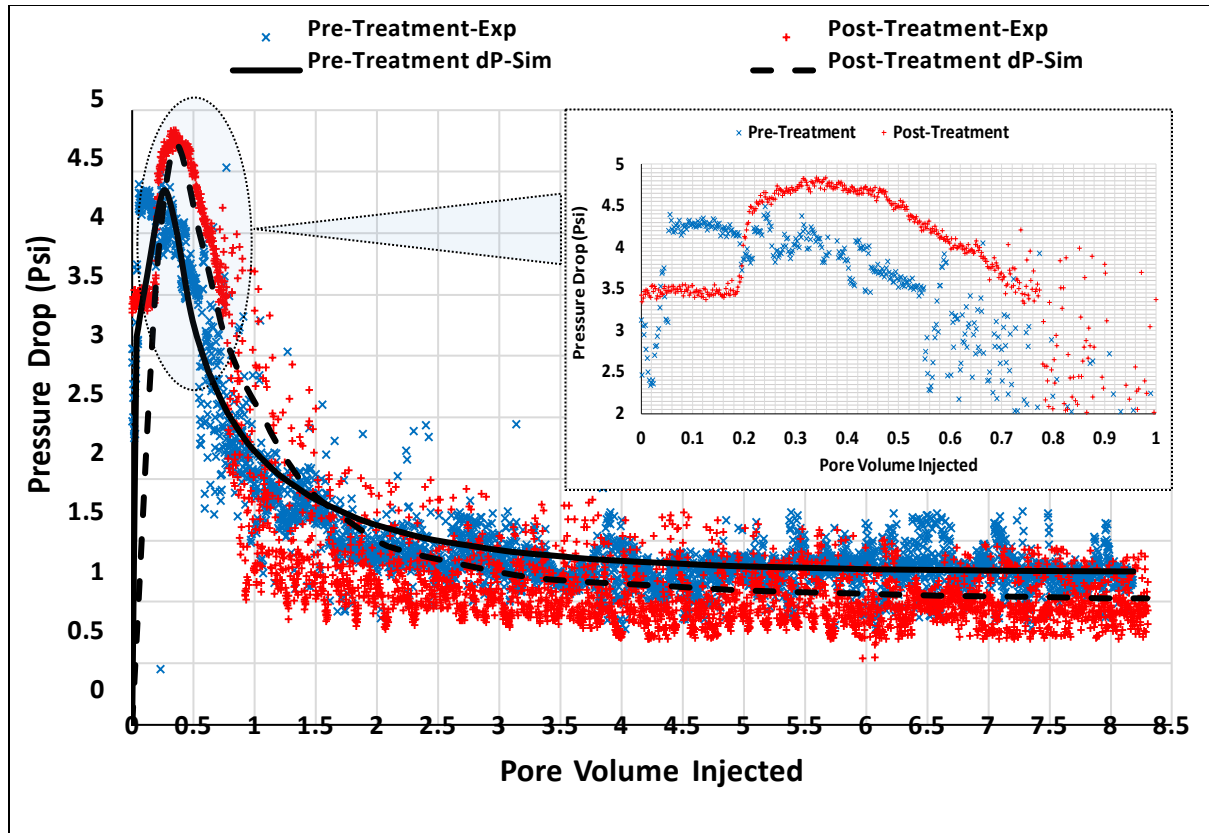

**Figure S7.** Experimental differential pressure (denoted by Exp) vs. pore volumes of CO<sub>2</sub> injected through the GB.1 sandstone sample pre- (blue cross symbol) and post-silylation (red plus symbol) with 2wt% of CPTS (inset compares the breakthrough points) Solid and dashed black lines represent the numerical simulation history matched differential pressure for pre- and post-silylation respectively (denoted by Sim).



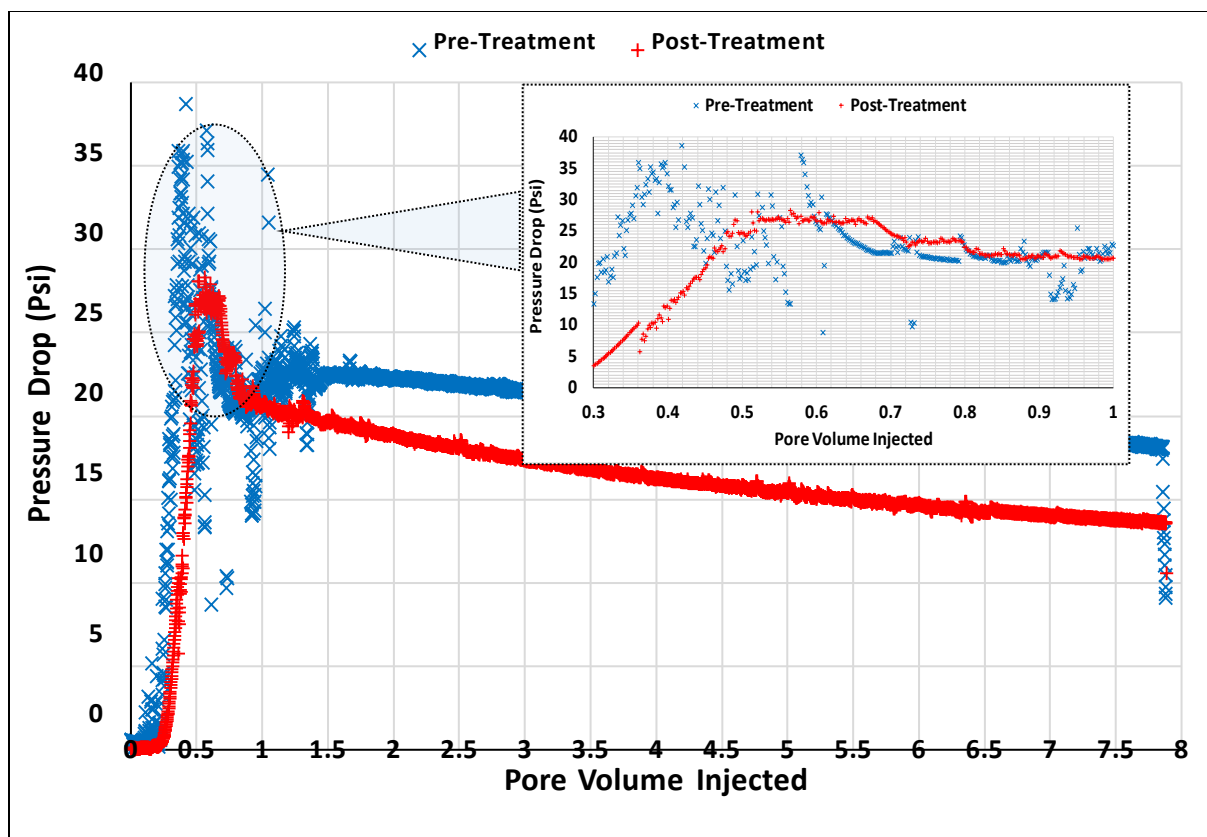

**Figure S8.** Differential pressure vs. pore volumes of brine injected through the GB.1 sandstone sample pre- (blue cross symbol) and post-silylation (red plus symbol) with 2wt% of CPTS (inset compares the breakthrough points).

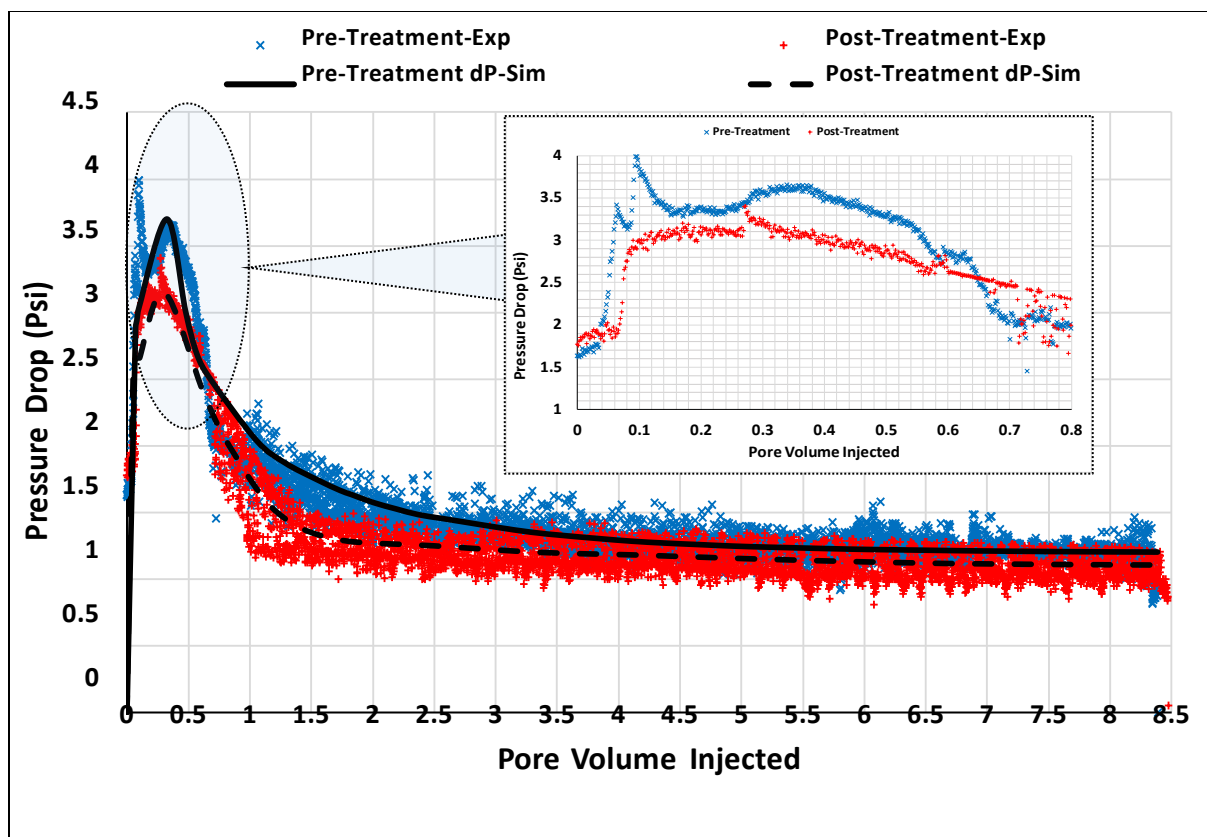

**Figure S9.** Experimental differential pressure (denoted by Exp) vs. pore volumes of CO<sub>2</sub> injected through the GB.3 sandstone sample pre- (blue cross symbol) and post-silylation (red plus symbol) with 2wt% of CPTS (inset compares the breakthrough points). Solid and dashed black lines represent the numerical simulation history matched differential pressure for pre- and post-silylation respectively (denoted by Sim).

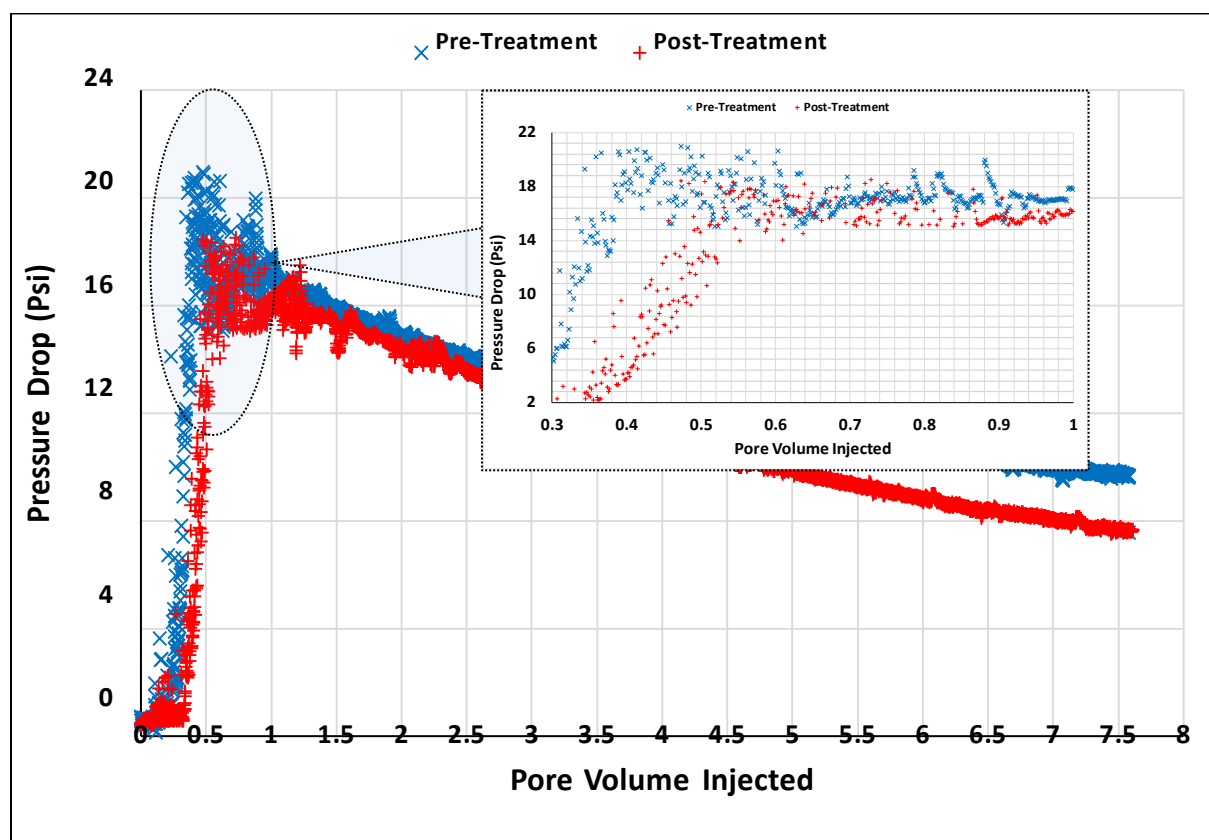

**Figure S10.** Differential pressure vs. pore volumes of brine injected through the GB.3 sandstone sample pre- (blue cross symbol) and post-silylation (red plus symbol) with 2wt% of CPTS (inset compares the breakthrough points).

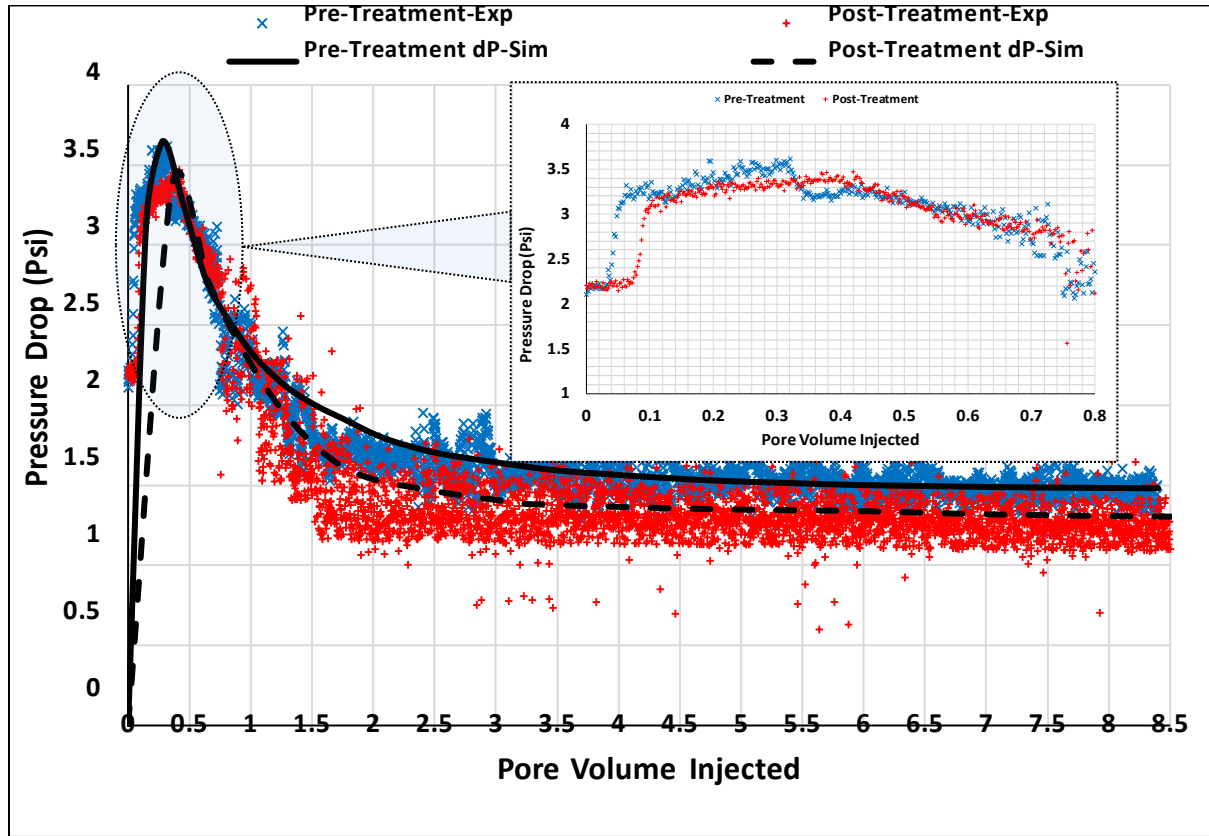

**Figure S11.** Experimental differential pressure (denoted by Exp) vs. pore volumes of CO<sub>2</sub> injected through the GB.4 sandstone sample pre- (blue cross symbol) and post-silylation (red plus symbol) with 2wt% of CPTS (inset compares the breakthrough points). Solid and dashed black lines represent the numerical simulation history matched differential pressure for pre- and post-silylation respectively (denoted by Sim).

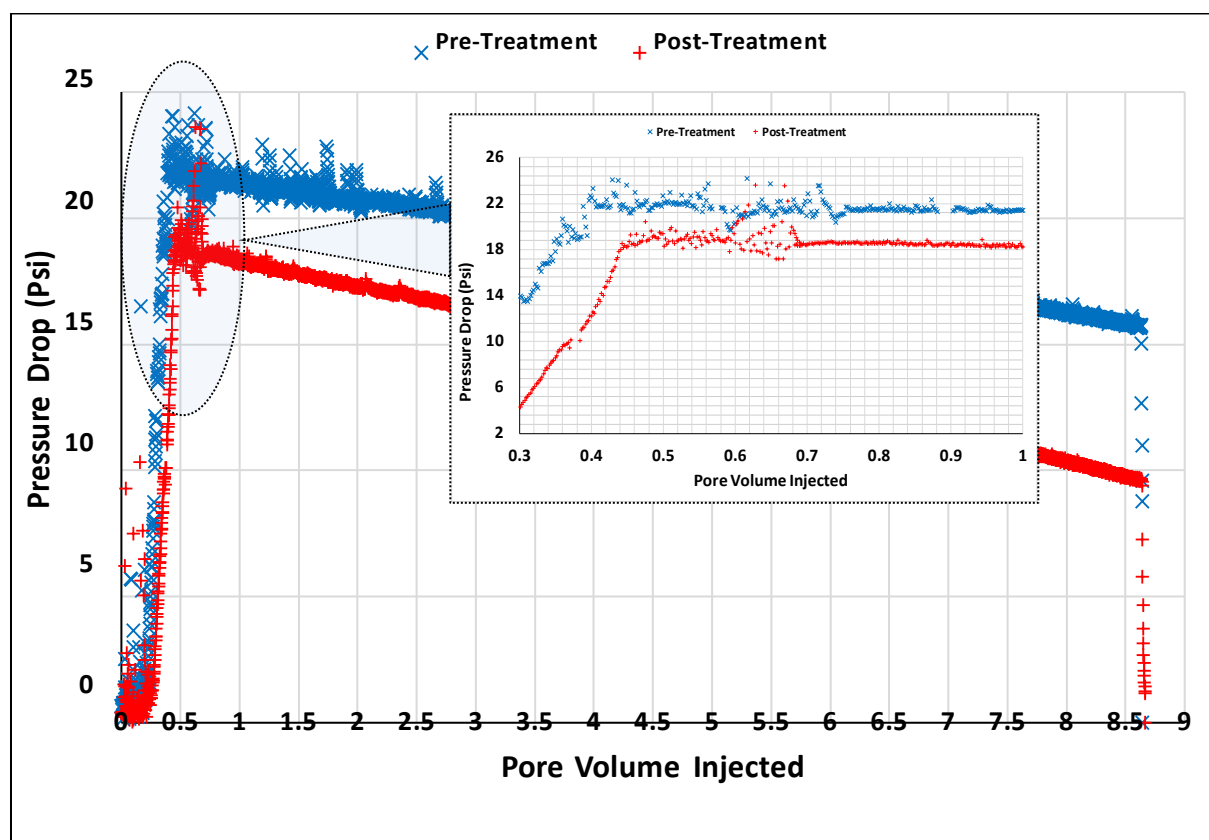

**Figure S12.** Differential pressure vs. pore volumes of brine injected through the GB.4 sandstone sample pre- (blue cross symbol) and post-silylation (red plus symbol) with 2wt% of CPTS (inset compares the breakthrough points).

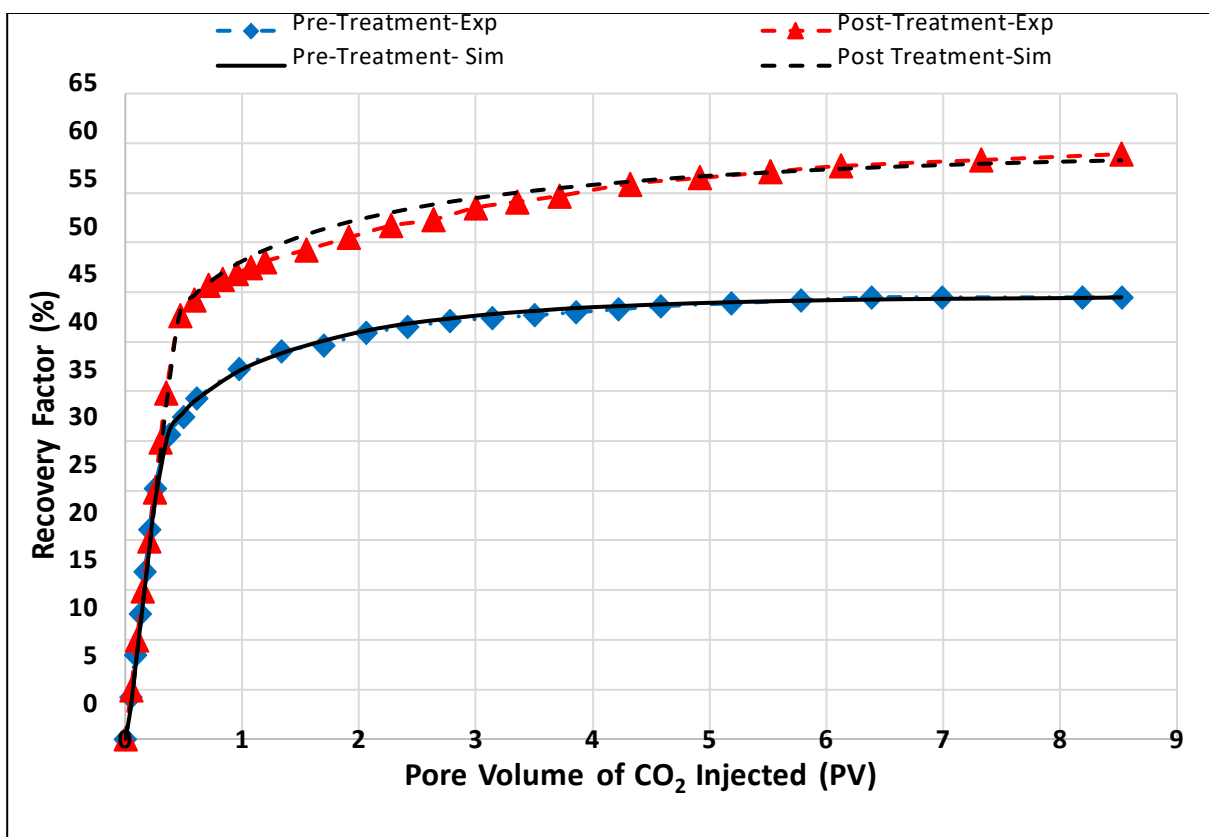

**Figure S13.** Experimental brine recovery factor during scCO<sub>2</sub> injection for pre-treatment (blue diamond symbol) and post-treatment (red triangle symbol) for GB.1 (denoted by Exp). Solid and dashed black lines represent the numerical simulated brine recovery for pre- and post-treatment respectively (denoted by Sim).

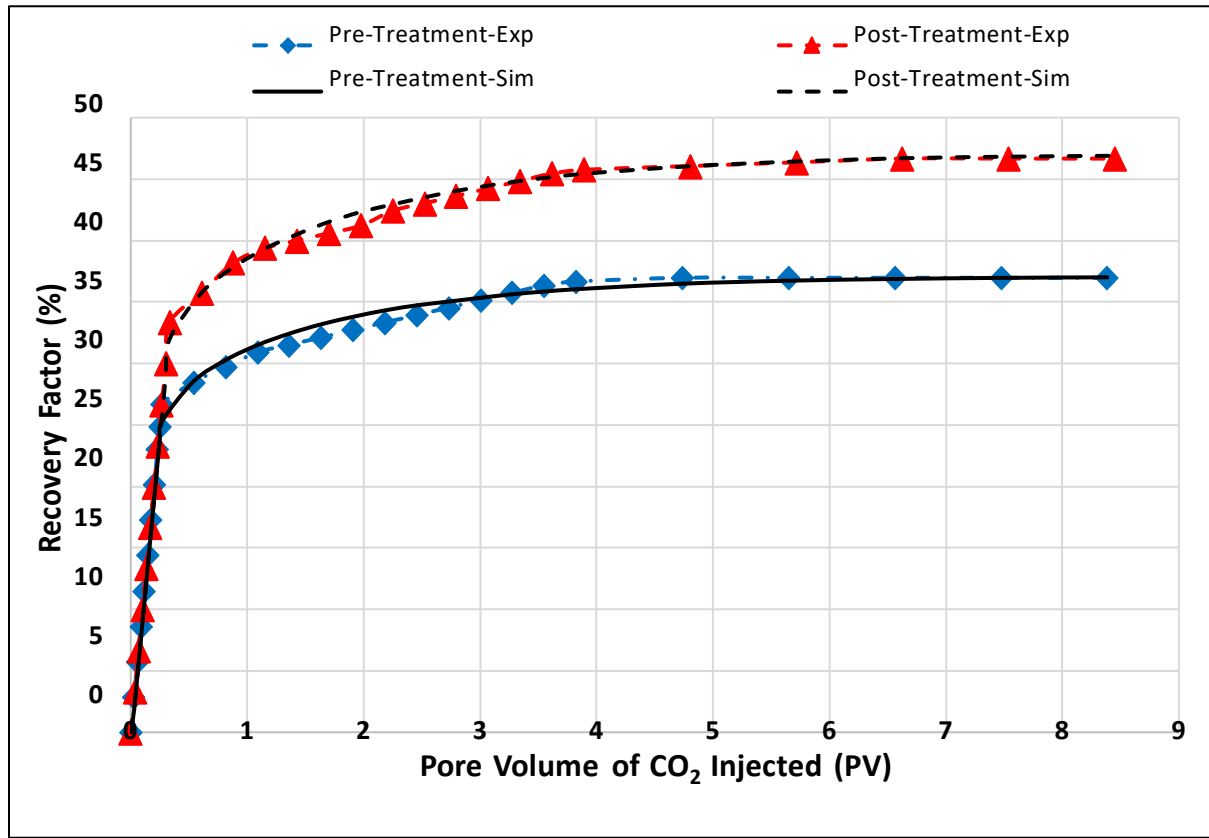

**Figure S14.** Experimental brine recovery factor during scCO<sub>2</sub> injection for pre-treatment (blue diamond symbol) and post-treatment (red triangle symbol) for GB.3 (denoted by Exp). Solid and dashed black lines represent the numerical simulated brine recovery for pre- and post-treatment respectively (denoted by Sim).

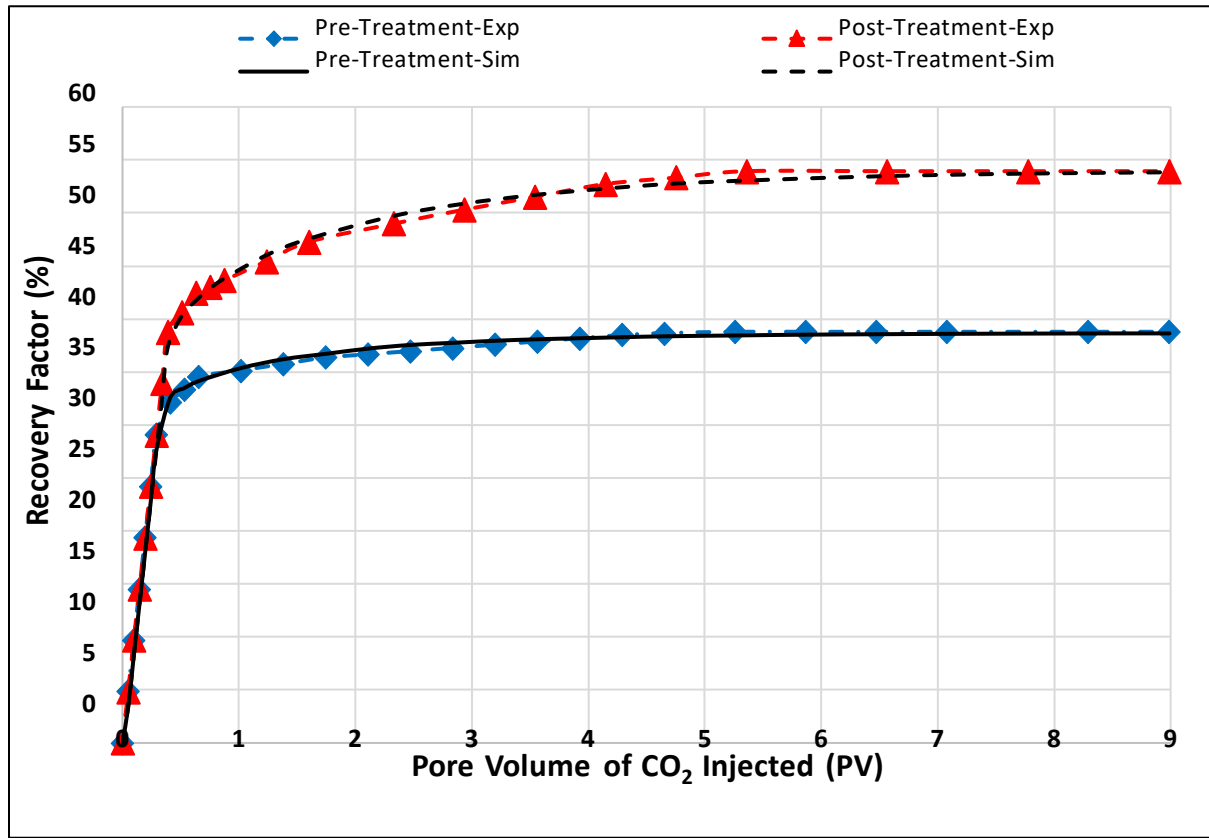

**Figure S15.** Experimental brine recovery factor during scCO<sub>2</sub> injection for pre-treatment (blue diamond symbol) and post-treatment (red triangle symbol) for GB.4 (denoted by Exp). Solid and dashed black lines represent the numerical simulated brine recovery for pre- and post-treatment respectively (denoted by Sim).



**Table S1.** Best-fit relative permeability parameters for core-floods fit to the Sigmund and McCaffery model.

| Sample ID           | N <sub>w</sub> | N <sub>g</sub> | A        | B        |
|---------------------|----------------|----------------|----------|----------|
| GB.1 Pre-treatment  | 7.6632         | 3.08277        | 0.23413  | 0.00435  |
| GB.1 Post-treatment | 6.0258         | 4.35972        | 0.189827 | 0.029713 |
| GB.2 Pre-treatment  | 3.60224        | 3.33202        | 0.122618 | 0.010885 |
| GB.2 Post-treatment | 4.19813        | 3.38595        | 0.11366  | 0.028578 |
| GB.3 Pre-treatment  | 4.00664        | 2.98626        | 0.149121 | 0.007186 |
| GB.3 Post-treatment | 3.71125        | 2.85487        | 0.176508 | 0.020602 |
| GB.4 Pre-treatment  | 3.34198        | 4.82534        | 0.162858 | 0.001    |
| GB.4 Post-treatment | 3.8303         | 2.98214        | 0.210274 | 0.007608 |

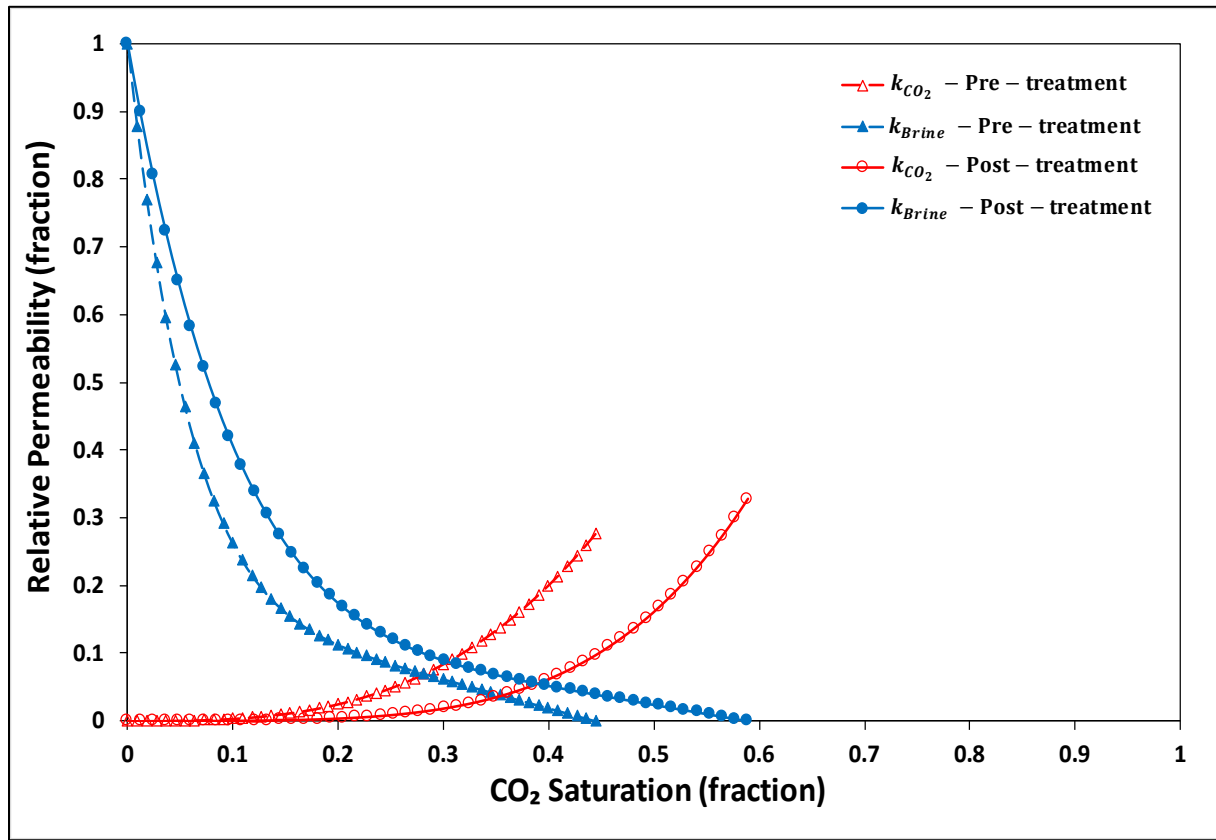

**Figure S16.** Relative permeability curves for the primary drainage conducted on pre-treated (triangle symbol) and post-treated (circle symbol) for GB.1 sample.

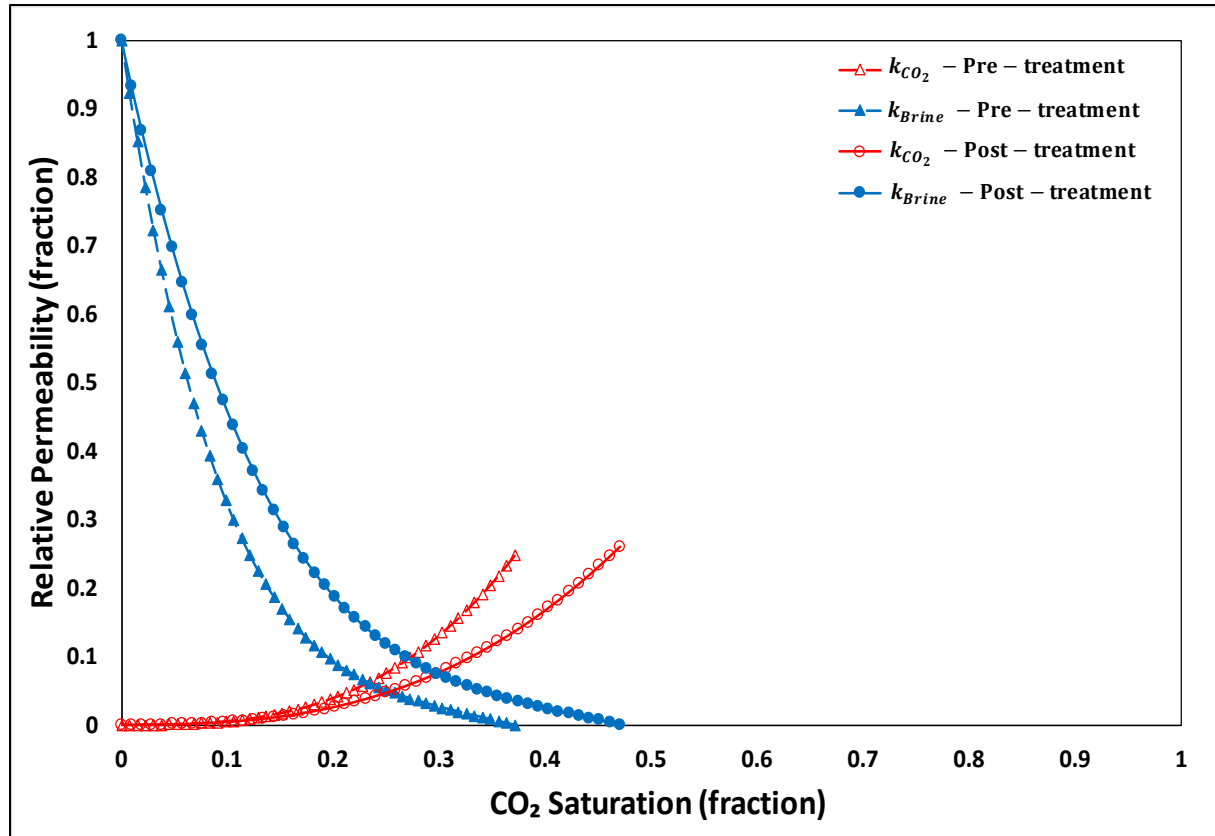

**Figure S17.** Relative permeability curves for the primary drainage conducted on pre-treated (triangle symbol) and post-treated (circle symbol) for GB.3 sample.

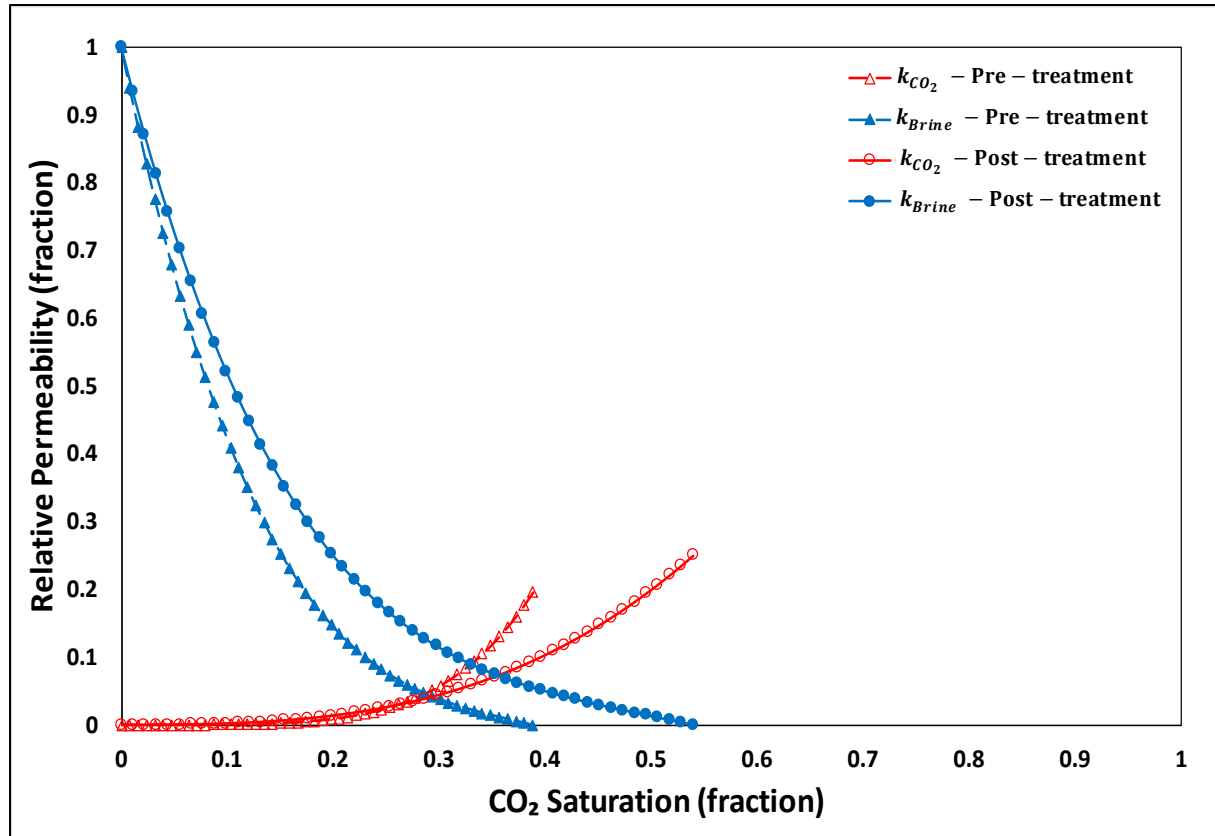

**Figure S18.** Relative permeability curves for the primary drainage conducted on pre-treated (triangle symbol) and post-treated (circle symbol) for GB.4 sample.
